# Supplementary material for: Genome-Wide Identification, Classification, and Expression Analyses of the CsDGAT Gene Family in Cannabis sativa L. and Their Response to Cold Treatment
Source: MDPI journal article supplement (doi:10.3390/ijms24044078), 2023-02-17
Supplement: s1 [file s1]

**Table S5. Expression levels of *CsDGAT* genes in hemp different tissues based on transcriptome expression data**

| Gene<br>name    | Tissuees    |             |             |             |             |
|-----------------|-------------|-------------|-------------|-------------|-------------|
|                 | Root        | Stem        | Leaf        | Flower      | Seed        |
| <i>CsDGAT1</i>  | 16.68989555 | 14.91194542 | 9.965772239 | 18.92905146 | 14.11570987 |
| <i>CsDGAT2</i>  | 5.658029959 | 6.093273905 | 6.135377377 | 12.40178864 | 11.57350379 |
| <i>CsDGAT3</i>  | 50.55683251 | 33.14767671 | 48.04105068 | 24.53482181 | 29.58781898 |
| <i>CsWSD1.1</i> | 27.88154874 | 22.8072075  | 26.3728708  | 7.211990603 | 6.660250025 |
| <i>CsWSD1.2</i> | 0.138871553 | 1.567880271 | 13.76138659 | 90.63111827 | 18.56183888 |
| <i>CsWSD1.3</i> | 0.507208123 | 36.02398901 | 62.8098018  | 7.670687629 | 0.572389026 |
| <i>CsWSD1.4</i> | 0.010039621 | 0.420516904 | 0.009317286 | 1.920944455 | 25.37958634 |
| <i>CsWSD1.5</i> | 0.072369898 | 0.68757218  | 0.084281228 | 7.163574358 | 0.889544988 |
| <i>CsWSD1.6</i> | 1.156807903 | 0.178405022 | 4.131008467 | 2.856281493 | 3.166763871 |
| <i>CsWSD1.7</i> | 25.82511061 | 59.49612718 | 219.6431739 | 7.067046092 | 6.495545026 |
