# Supplementary material for: Genome-Wide Identification, Classification, and Expression Analyses of the CsDGAT Gene Family in Cannabis sativa L. and Their Response to Cold Treatment
Source: MDPI journal article supplement (doi:10.3390/ijms24044078), 2023-02-17
Supplement: s1 [file s1]

**Table S1 The DGAT1, DGAT2 DGAT3 and WSD enzymes used for the phylogenetic analyses.**

| <b>Specie</b>                  | <b>Taxa terminologies</b> | <b>Gene</b>     | <b>Database</b> | <b>Access</b>                      |
|--------------------------------|---------------------------|-----------------|-----------------|------------------------------------|
| <i>Aquilegia coerulea</i>      | <i>Aq</i>                 | <i>DGAT3</i>    | JGI             | Aquca_003_00301.1                  |
| <i>Arabidopsis lyrata</i>      | <i>Al</i>                 | <i>DGAT3</i>    | JGI             | 913875                             |
| <i>Arabidopsis thaliana</i>    | <i>At</i>                 | <i>DGAT1</i>    | TAIR            | AT2G19450                          |
| <i>Arabidopsis thaliana</i>    | <i>At</i>                 | <i>DGAT2</i>    | TAIR            | AT3G51520                          |
| <i>Arabidopsis thaliana</i>    | <i>At</i>                 | <i>DGAT3</i>    | TAIR            | AT1G48300                          |
| <i>Arabidopsis thaliana</i>    | <i>At</i>                 | <i>WS/DGAT1</i> | TAIR            | AT5G37300.1                        |
| <i>Arabidopsis thaliana</i>    | <i>At</i>                 | <i>WS/DGAT6</i> | TAIR            | AT3G49210.1                        |
| <i>Arabidopsis thaliana</i>    | <i>At</i>                 | <i>WS/DGAT7</i> | TAIR            | AT5G12420.1                        |
| <i>Arachis hypogaea</i>        | <i>Ah</i>                 | <i>DGAT1-1</i>  | NCBI            | KC736068                           |
| <i>Arachis hypogaea</i>        | <i>Ah</i>                 | <i>DGAT1-2</i>  | NCBI            | KC736069                           |
| <i>Arachis hypogaea</i>        | <i>Ah</i>                 | <i>DGAT2</i>    | NCBI            | AEO11788                           |
| <i>Arachis hypogaea</i>        | <i>Ah</i>                 | <i>DGAT3-1</i>  | NCBI            | ABW34442                           |
| <i>Arachis hypogaea</i>        | <i>Ah</i>                 | <i>DGAT3-2</i>  | NCBI            | AAX62735                           |
| <i>Arachis hypogaea</i>        | <i>Ah</i>                 | <i>DGAT3-3</i>  | NCBI            | KC736067                           |
| <i>Arachis hypogaea</i>        | <i>Ah</i>                 | <i>WS/DGAT</i>  | JGI             | arahy.Tifrunner.gnm1.ann1.J3RNWS.1 |
| <i>Brachypodium distachyon</i> | <i>Bradi</i>              | <i>DGAT1</i>    | JGI             | Bradi1g37750.1                     |
| <i>Brachypodium distachyon</i> | <i>Bradi</i>              | <i>DGAT1</i>    | JGI             | Bradi2g33180.1                     |
| <i>Brachypodium distachyon</i> | <i>Bradi</i>              | <i>DGAT2</i>    | JGI             | Bradi1g42650.1                     |
| <i>Brachypodium distachyon</i> | <i>Bradi</i>              | <i>DGAT2</i>    | JGI             | Bradi3g53247.1                     |
| <i>Brachypodium distachyon</i> | <i>Bradi</i>              | <i>DGAT3</i>    | JGI             | Bradi2g36890.1                     |
| <i>Brassica juncea</i>         | <i>Bj</i>                 | <i>DGAT1</i>    | NCBI            | AAY40784.1                         |
| <i>Brassica napus</i>          | <i>Bn</i>                 | <i>DGAT2</i>    | NCBI            | ACO90187                           |
| <i>Brassica napus</i>          | <i>Bn</i>                 | <i>DGAT1</i>    | NCBI            | AAD45536.1                         |

|                                  |             |                |      |                              |
|----------------------------------|-------------|----------------|------|------------------------------|
| <i>Brassica napus</i>            | <i>Bn</i>   | <i>DGAT1</i>   | NCBI | AFM31260.1                   |
| <i>Brassica napus</i>            | <i>Bn</i>   | <i>DGAT1</i>   | NCBI | AFM31259.1                   |
| <i>Brassica napus</i>            | <i>Bn</i>   | <i>DGAT1</i>   | NCBI | AFM31262.1                   |
| <i>Brassica rapa</i>             | <i>Bra</i>  | <i>DGAT1</i>   | JGI  | Brara.G00164.1               |
| <i>Brassica rapa</i>             | <i>Bra</i>  | <i>DGAT1</i>   | JGI  | Brara.I01120.1               |
| <i>Brassica rapa</i>             | <i>Bra</i>  | <i>DGAT2</i>   | JGI  | Brara.A02083                 |
| <i>Brassica rapa</i>             | <i>Bra</i>  | <i>DGAT2</i>   | JGI  | Brara.C04367.1               |
| <i>Brassica rapa</i>             | <i>Bra</i>  | <i>DGAT3</i>   | JGI  | Brara.H00366.1               |
| <i>Brassica rapa</i>             | <i>Bra</i>  | <i>WS/DGAT</i> | JGI  | Brara.B01454.1.p             |
| <i>Brassica rapa</i>             | <i>Bra</i>  | <i>WS/DGAT</i> | JGI  | Brara.B00458.1               |
| <i>Brassica rapa</i>             | <i>Bra</i>  | <i>WS/DGAT</i> | JGI  | Brara.C01989.1               |
| <i>Capsella rubella</i>          | <i>Car</i>  | <i>DGAT3</i>   | JGI  | Carubv10011099m              |
| <i>Carica papaya</i>             | <i>Cp</i>   | <i>DGAT3</i>   | JGI  | evm.model.supercontig_146.13 |
| <i>Chlamydomonas reinhardtii</i> | <i>Cre</i>  | <i>DGAT1</i>   | JGI  | Cre01g045903.t1.1            |
| <i>Chlamydomonas reinhardtii</i> | <i>Cre</i>  | <i>DGAT2</i>   | JGI  | Cre06.g299050.t1.2           |
| <i>Chlamydomonas reinhardtii</i> | <i>Cre</i>  | <i>DGAT2</i>   | JGI  | Cre09.g386912.t1.1           |
| <i>Chlamydomonas reinhardtii</i> | <i>Cre</i>  | <i>DGAT2</i>   | JGI  | Cre02.g079050.t1.3           |
| <i>Chlamydomonas reinhardtii</i> | <i>Cre</i>  | <i>DGAT2</i>   | JGI  | Cre03.g205050.t1.2           |
| <i>Chlamydomonas reinhardtii</i> | <i>Cre</i>  | <i>DGAT2</i>   | JGI  | Cre12.g557750.t1.3           |
| <i>Citrus clementina</i>         | <i>Cic</i>  | <i>DGAT3</i>   | JGI  | Ciclev10020833m              |
| <i>Citrus clementina</i>         | <i>Cic</i>  | <i>DGAT3</i>   | JGI  | Ciclev10005574m              |
| <i>Citrus sinensis</i>           | <i>Csi</i>  | <i>DGAT3</i>   | JGI  | orange1.1g023360m            |
| <i>Citrus sinensis</i>           | <i>Csi</i>  | <i>DGAT3</i>   | JGI  | orange1.1g018470m            |
| <i>Echium pitardii</i>           | <i>Ep</i>   | <i>DGAT1</i>   | NCBI | ACO55635.1                   |
| <i>Eucalyptus grandis</i>        | <i>Eugr</i> | <i>DGAT3</i>   | JGI  | Eucgr.H04131.1               |
| <i>Euonymus alatus</i>           | <i>Ea</i>   | <i>DGAT1</i>   | NCBI | AAV31083.1                   |

|                                  |               |                |      |                         |
|----------------------------------|---------------|----------------|------|-------------------------|
| <i>Fragaria vesca</i>            | <i>Fve</i>    | <i>DGAT3</i>   | JGI  | mrna22793.1-v1.0-hybrid |
| <i>Glycine max</i>               | <i>Glyma</i>  | <i>DGAT1</i>   | JGI  | Glyma09G065300.1        |
| <i>Glycine max</i>               | <i>Glyma</i>  | <i>DGAT1</i>   | JGI  | Glyma13G106100.1        |
| <i>Glycine max</i>               | <i>Glyma</i>  | <i>DGAT1</i>   | JGI  | Glyma17G053300.1        |
| <i>Glycine max</i>               | <i>Glyma</i>  | <i>DGAT2</i>   | JGI  | Glyma09G195400.1        |
| <i>Glycine max</i>               | <i>Glyma</i>  | <i>DGAT2</i>   | JGI  | Glyma11G088800.1        |
| <i>Glycine max</i>               | <i>Glyma</i>  | <i>DGAT2</i>   | JGI  | Glyma01G156000.1        |
| <i>Glycine max</i>               | <i>Glyma</i>  | <i>DGAT2</i>   | JGI  | Glyma16G115700.1        |
| <i>Glycine max</i>               | <i>Glyma</i>  | <i>DGAT2</i>   | JGI  | Glyma16G115800.1        |
| <i>Glycine max</i>               | <i>Glyma</i>  | <i>DGAT3</i>   | JGI  | Glyma13G118300.1        |
| <i>Glycine max</i>               | <i>Glyma</i>  | <i>DGAT3</i>   | JGI  | Glyma17G041600.1        |
| <i>Glycine max</i>               | <i>Glyma</i>  | <i>WS/DGAT</i> | JGI  | Glyma.09G196400.1       |
| <i>Glycine max</i>               | <i>Glyma</i>  | <i>WS/DGAT</i> | JGI  | Glyma.06G291700.1       |
| <i>Glycine max</i>               | <i>Glyma</i>  | <i>WS/DGAT</i> | JGI  | Glyma.12G114400.1       |
| <i>Gossypium raimondii</i>       | <i>Gorai.</i> | <i>DGAT3</i>   | JGI  | Gorai.007G116800.1      |
| <i>Jatropha curcas</i>           | <i>Jc</i>     | <i>DGAT1</i>   | NCBI | ABB84383.1              |
| <i>Lotus japonicus</i>           | <i>Lj</i>     | <i>DGAT1</i>   | NCBI | AAW51456.1              |
| <i>Malus domestica</i>           | <i>Md</i>     | <i>DGAT3</i>   | JGI  | MDP0000192819           |
| <i>Manihot esculenta</i>         | <i>Manes</i>  | <i>DGAT3</i>   | JGI  | Manes.01G234700         |
| <i>Manihot esculenta</i>         | <i>Manes</i>  | <i>DGAT3</i>   | JGI  | Manes.03G212700         |
| <i>Medicago truncatula</i>       | <i>Medtr</i>  | <i>DGAT1</i>   | JGI  | Medtr2g039940.1         |
| <i>Medicago truncatula</i>       | <i>Medtr</i>  | <i>DGAT2</i>   | JGI  | Medtr5g024990.1         |
| <i>Medicago truncatula</i>       | <i>Medtr</i>  | <i>DGAT2</i>   | JGI  | Medtr8g072550.1         |
| <i>Medicago truncatula</i>       | <i>Medtr</i>  | <i>DGAT2</i>   | JGI  | Medtr8g072540.1         |
| <i>Medicago truncatula</i>       | <i>Medtr</i>  | <i>DGAT3</i>   | JGI  | Medtr4g124080.1         |
| <i>Micromonas pusilla</i> RCC299 | <i>Mp</i>     | <i>DGAT2</i>   | JGI  | EuGene.0500010193       |

|                                  |              |                 |      |                            |
|----------------------------------|--------------|-----------------|------|----------------------------|
| <i>Micromonas pusilla</i> RCC300 | <i>Mp</i>    | <i>DGAT2</i>    | JGI  | EuGene.1000010156          |
| <i>Micromonas pusilla</i> RCC301 | <i>Mp</i>    | <i>DGAT2</i>    | JGI  | fgenes2_pg.C_Chrr_03000495 |
| <i>Micromonas pusilla</i> RCC302 | <i>Mp</i>    | <i>DGAT2</i>    | JGI  | e_gw2.06.451.1             |
| <i>Micromonas pusilla</i> RCC303 | <i>Mp</i>    | <i>DGAT2</i>    | JGI  | est_cluster_kg.            |
| <i>Mimulus guttatus</i>          | <i>Migut</i> | <i>DGAT3</i>    | JGI  | Migut.H01460.1.p           |
| <i>Nicotiana tabacum</i>         | <i>Nt</i>    | <i>DGAT1</i>    | NCBI | AAF19345.1                 |
| <i>Olea europaea</i>             | <i>Oe</i>    | <i>DGAT1</i>    | NCBI | AAS01606.1                 |
| <i>Oryza sativa</i>              | <i>Os</i>    | <i>DGAT1</i>    | JGI  | Os06g36800.1               |
| <i>Oryza sativa</i>              | <i>Os</i>    | <i>DGAT1</i>    | JGI  | Os05g10810.1               |
| <i>Oryza sativa</i>              | <i>Os</i>    | <i>DGAT2</i>    | JGI  | Os02g48350.1               |
| <i>Oryza sativa</i>              | <i>Os</i>    | <i>DGAT2</i>    | JGI  | Os06g22080.1               |
| <i>Oryza sativa</i>              | <i>Os</i>    | <i>DGAT3</i>    | JGI  | Os05g04620.1               |
| <i>Oryza sativa</i>              | <i>Os</i>    | <i>WS/DGAT1</i> | JGI  | Os01g48874.1               |
| <i>Oryza sativa</i>              | <i>Os</i>    | <i>WS/DGAT3</i> | JGI  | Os01g48874.2               |
| <i>Oryza sativa</i>              | <i>Os</i>    | <i>WS/DGAT2</i> | JGI  | Os05g48260.1               |
| <i>Ostreococcus lucimarinus</i>  | <i>Ol</i>    | <i>DGAT2</i>    | JGI  | eugene.1200010135          |
| <i>Ostreococcus lucimarinus</i>  | <i>Ol</i>    | <i>DGAT2</i>    | JGI  | eugene.1500010069          |
| <i>Ostreococcus lucimarinus</i>  | <i>Ol</i>    | <i>DGAT2</i>    | JGI  | fgenes1_pm.C_Chrr_13000021 |
| <i>Ostreococcus lucimarinus</i>  | <i>Ol</i>    | <i>DGAT2</i>    | JGI  | fgenes1_pg.C_Chrr_8000176  |
| <i>Panicum virgatum</i>          | <i>Pavir</i> | <i>DGAT1</i>    | JGI  | J36735.1                   |
| <i>Panicum virgatum</i>          | <i>Pavir</i> | <i>DGAT1</i>    | JGI  | J31697.1                   |
| <i>Panicum virgatum</i>          | <i>Pavir</i> | <i>DGAT1</i>    | JGI  | J02054.1                   |
| <i>Panicum virgatum</i>          | <i>Pavir</i> | <i>DGAT1</i>    | JGI  | Da00530.1                  |
| <i>Panicum virgatum</i>          | <i>Pavir</i> | <i>DGAT2</i>    | JGI  | J34441.1                   |
| <i>Panicum virgatum</i>          | <i>Pavir</i> | <i>DGAT2</i>    | JGI  | Ab03087.1                  |
| <i>Panicum virgatum</i>          | <i>Pavir</i> | <i>DGAT2</i>    | JGI  | Da00364.1                  |

|                                   |              |              |      |                   |
|-----------------------------------|--------------|--------------|------|-------------------|
| <i>Panicum virgatum</i>           | <i>Pavir</i> | <i>DGAT2</i> | JGI  | Db01505.1         |
| <i>Perilla frutescens</i>         | <i>Pf</i>    | <i>DGAT1</i> | NCBI | AAG23696.1        |
| <i>Phaseolus vulgaris</i>         | <i>Phvul</i> | <i>DGAT1</i> | JGI  | Phvul009G230700.1 |
| <i>Phaseolus vulgaris</i>         | <i>Phvul</i> | <i>DGAT1</i> | JGI  | Phvul003G134900.1 |
| <i>Phaseolus vulgaris</i>         | <i>Phvul</i> | <i>DGAT2</i> | JGI  | Phvul002G119500.1 |
| <i>Phaseolus vulgaris</i>         | <i>Phvul</i> | <i>DGAT2</i> | JGI  | Phvul003G272500.1 |
| <i>Phaseolus vulgaris</i>         | <i>Phvul</i> | <i>DGAT2</i> | JGI  | Phvul003G272600.1 |
| <i>Phaseolus vulgaris</i>         | <i>Phvul</i> | <i>DGAT3</i> | JGI  | Phvul003G123000.1 |
| <i>Physcomitrella patens</i>      | <i>Phpat</i> | <i>DGAT1</i> | JGI  | Pp3c15_23830      |
| <i>Physcomitrella patens</i>      | <i>Phpat</i> | <i>DGAT1</i> | JGI  | Pp3c9_24440       |
| <i>Physcomitrella patens</i>      | <i>Phpat</i> | <i>DGAT2</i> | JGI  | Pp3c22_20760      |
| <i>Physcomitrella patens</i>      | <i>Phpat</i> | <i>DGAT2</i> | JGI  | Pp3c14_20110      |
| <i>Populus trichocarpa</i>        | <i>Potri</i> | <i>DGAT1</i> | JGI  | Potri018G066100.1 |
| <i>Populus trichocarpa</i>        | <i>Potri</i> | <i>DGAT1</i> | JGI  | Potri006G147600.1 |
| <i>Populus trichocarpa</i>        | <i>Potri</i> | <i>DGAT2</i> | JGI  | Potri011G145900.1 |
| <i>Populus trichocarpa</i>        | <i>Potri</i> | <i>DGAT3</i> | JGI  | Potri002G187300.1 |
| <i>Populus trichocarpa</i>        | <i>Potri</i> | <i>DGAT3</i> | JGI  | Potri010G003200.1 |
| <i>Ricinus communis</i>           | <i>Rc</i>    | <i>DGAT1</i> | NCBI | 29912.t000099     |
| <i>Ricinus communis</i>           | <i>Rc</i>    | <i>DGAT2</i> | JGI  | 29682.t000014     |
| <i>Ricinus communis</i>           | <i>Rc</i>    | <i>DGAT3</i> | JGI  | 29889.t000177     |
| <i>Selaginella moellendorffii</i> | <i>Sm</i>    | <i>DGAT1</i> | JGI  | Sm_404425         |
| <i>Selaginella moellendorffii</i> | <i>Sm</i>    | <i>DGAT1</i> | JGI  | Sm_81638          |
| <i>Selaginella moellendorffii</i> | <i>Sm</i>    | <i>DGAT2</i> | JGI  | Sm_96204          |
| <i>Setaria italica</i>            | <i>Si</i>    | <i>DGAT1</i> | JGI  | Si006298m.g       |
| <i>Setaria italica</i>            | <i>Si</i>    | <i>DGAT1</i> | JGI  | Si021762m.g       |
| <i>Setaria italica</i>            | <i>Si</i>    | <i>DGAT2</i> | JGI  | Si017737m.g       |

|                             |              |                |      |                         |
|-----------------------------|--------------|----------------|------|-------------------------|
| <i>Setaria italica</i>      | <i>Si</i>    | <i>DGAT2</i>   | JGI  | Si006465m.g             |
| <i>Solanum lycopersicum</i> | <i>Soly</i>  | <i>DGAT3</i>   | JGI  | Solyc12g098850.1.1      |
| <i>Solanum tuberosum</i>    | <i>St</i>    | <i>DGAT3</i>   | JGI  | PGSC0003DMP400008124    |
| <i>Sorghum bicolor</i>      | <i>Sobic</i> | <i>DGAT1</i>   | JGI  | Sobic010G170000.1       |
| <i>Sorghum bicolor</i>      | <i>Sobic</i> | <i>DGAT1</i>   | JGI  | Sobic009G072700         |
| <i>Sorghum bicolor</i>      | <i>Sobic</i> | <i>DGAT2</i>   | JGI  | Sobic010G134400.1       |
| <i>Sorghum bicolor</i>      | <i>Sobic</i> | <i>DGAT2</i>   | JGI  | Sobic004G261900.1       |
| <i>Sorghum bicolor</i>      | <i>Sobic</i> | <i>DGAT2</i>   | JGI  | Sobic.008G049000.3      |
| <i>Sorghum bicolor</i>      | <i>Sobic</i> | <i>DGAT3</i>   | JGI  | Sobic009G034600.1       |
| <i>Sorghum bicolor</i>      | <i>Sobic</i> | <i>WS/DGAT</i> | JGI  | SbiRTX430.03G334100.1.p |
| <i>Theobroma cacao</i>      | <i>Thecc</i> | <i>DGAT3</i>   | JGI  | Thecc1EG004941t1        |
| <i>Tropaeolum majus</i>     | <i>Tm</i>    | <i>DGAT1</i>   | NCBI | AAM03340.2              |
| <i>Vernicia fordii</i>      | <i>Vf</i>    | <i>DGAT1</i>   | NCBI | ABC94472.1              |
| <i>Vernonia galamensis</i>  | <i>Vg</i>    | <i>DGAT1</i>   | NCBI | ABV21945.1              |
| <i>Vitis vinifera</i>       | <i>Vv</i>    | <i>DGAT3</i>   | JGI  | GSVIVT01017699001       |
| <i>Vitis vinifera</i>       | <i>Vv</i>    | <i>DGAT1</i>   | NCBI | XP_002279345.1          |
| <i>Volvox carteri</i>       | <i>Vocar</i> | <i>DGAT1</i>   | JGI  | Vocar20008498m.g        |
| <i>Volvox carteri</i>       | <i>Vocar</i> | <i>DGAT2</i>   | JGI  | Vocar.0001s0245         |
| <i>Volvox carteri</i>       | <i>Vocar</i> | <i>DGAT2</i>   | JGI  | Vocar.0008s0353.1       |
| <i>Volvox carteri</i>       | <i>Vocar</i> | <i>DGAT2</i>   | JGI  | Vocar.0047s0035         |
| <i>Zea mays</i>             | <i>Zm</i>    | <i>DGAT1</i>   | JGI  | GRMZM2G130749           |
| <i>Zea mays</i>             | <i>Zm</i>    | <i>DGAT1</i>   | JGI  | GRMZM2G169089           |
| <i>Zea mays</i>             | <i>Zm</i>    | <i>DGAT2</i>   | JGI  | GRMZM2G042356           |
| <i>Zea mays</i>             | <i>Zm</i>    | <i>DGAT2</i>   | JGI  | GRMZM2G050641           |
| <i>Zea mays</i>             | <i>Zm</i>    | <i>DGAT3</i>   | JGI  | GRMZM2G122943_T01       |
| <i>Cannabis sativa</i>      | <i>Cs</i>    | <i>DGAT1</i>   | NCBI | XP_030487910.1          |

|                        |           |                   |      |                |
|------------------------|-----------|-------------------|------|----------------|
| <i>Cannabis sativa</i> | <i>Cs</i> | <i>DGAT2</i>      | NCBI | XP_030486482.1 |
| <i>Cannabis sativa</i> | <i>Cs</i> | <i>DGAT3</i>      | NCBI | XP_030507626.1 |
| <i>Cannabis sativa</i> | <i>Cs</i> | <i>WS/DGAT1.1</i> | NCBI | XP_030501890.1 |
| <i>Cannabis sativa</i> | <i>Cs</i> | <i>WS/DGAT1.2</i> | NCBI | XP_030492184.1 |
| <i>Cannabis sativa</i> | <i>Cs</i> | <i>WS/DGAT1.3</i> | NCBI | XP_030486720.1 |
| <i>Cannabis sativa</i> | <i>Cs</i> | <i>WS/DGAT1.4</i> | NCBI | XP_030488196.1 |
| <i>Cannabis sativa</i> | <i>Cs</i> | <i>WS/DGAT1.5</i> | NCBI | XP_030503296.1 |
| <i>Cannabis sativa</i> | <i>Cs</i> | <i>WS/DGAT1.6</i> | NCBI | XP_030492330.1 |
| <i>Cannabis sativa</i> | <i>Cs</i> | <i>WS/DGAT1.7</i> | NCBI | XP_030486282.1 |

---
