# Supplementary material for: Genome-Wide Identification, Classification, and Expression Analyses of the CsDGAT Gene Family in Cannabis sativa L. and Their Response to Cold Treatment
Source: MDPI journal article supplement (doi:10.3390/ijms24044078), 2023-02-17
Supplement: s1 [file s1]

**Table S4. Expression levels of *CsDGAT* genes in hemp different varieties based on transcriptome expression data**

| <b>Gene name</b> | <b>Varieties</b> |             |             |             |             |             |             |             |               |
|------------------|------------------|-------------|-------------|-------------|-------------|-------------|-------------|-------------|---------------|
|                  | Blackberry Kush  | Black Lime  | Cherry Chem | Canna Tsu   | Mama Thai   | Sour Diesel | Terple      | Valley Fire | White Cookies |
| DGAT1            | 23.69757881      | 26.93819867 | 11.21502566 | 28.26532282 | 21.92621501 | 51.75651997 | 21.33940707 | 43.9993756  | 27.05278734   |
| DGAT2            | 4.511627871      | 6.624751987 | 6.451530232 | 6.604363599 | 5.571167481 | 9.212268791 | 7.32359415  | 9.459155926 | 9.057085507   |
| DGAT3            | 28.27914902      | 30.64001309 | 24.25456632 | 36.54814976 | 50.32785399 | 30.15424747 | 24.17681369 | 21.80001972 | 18.20999722   |
| CsWSD1.1         | 8.326863439      | 2.731753408 | 2.262103122 | 1.247117667 | 2.95032925  | 1.87285439  | 2.802380928 | 4.503905092 | 2.367005506   |
| CsWSD1.2         | 6.383866708      | 16.60134237 | 54.30921524 | 12.33719441 | 19.01090341 | 39.06888234 | 15.77478254 | 21.22419218 | 4.156155457   |
| CsWSD1.3         | 0.501095007      | 0.787279626 | 0.15357504  | 0.13579095  | 0.260712111 | 0.120387026 | 0.669912887 | 2.914963388 | 0.246703323   |
| CsWSD1.4         | 1.324611775      | 0           | 0.157428896 | 0           | 0.302605475 | 0.074676809 | 0           | 0.201773964 | 0             |
| CsWSD1.5         | 0.423116988      | 0.08915882  | 1.314156333 | 0.07708693  | 0.481005642 | 0.331927075 | 0.074059543 | 0.240687226 | 0.068265581   |
| CsWSD1.6         | 0.092751487      | 0.087268453 | 0.014125824 | 0.132150267 | 1.748604848 | 0.036521048 | 0.458927793 | 0.39294317  | 0.013562445   |
| CsWSD1.7         | 16.95695012      | 12.87896039 | 1.468791915 | 1.86371715  | 13.76718651 | 2.441460267 | 9.183908064 | 9.45417112  | 2.078445306   |
