# Supplementary material for: Genome-Wide Identification, Classification, and Expression Analyses of the CsDGAT Gene Family in Cannabis sativa L. and Their Response to Cold Treatment
Source: MDPI journal article supplement (doi:10.3390/ijms24044078), 2023-02-17
Supplement: s1 [file s1]

**Table S2. Primers used for subcellular localization**

| Gene              | Sequence                                                |
|-------------------|---------------------------------------------------------|
| <i>CsDGAT1F</i>   | cagtCGTCTCacaacatggcgatttcagattcgcc                     |
| <i>CsDGAT1R</i>   | cagtCGTCTCatacattcatttgcccttttcggt                      |
| <i>CsDGAT2F</i>   | cagtCGTCTCacaacatggctggataatcagaa                       |
| <i>CsDGAT2R</i>   | cagtCGTCTCatacaaaggacttcaactcaaggt                      |
| <i>CsDGAT3F</i>   | cagtCGTCTCacaacatggaggtttcgggttcctcc                    |
| <i>CsDGAT3R</i>   | cagtCGTCTCatacaaactgatgcagccaacccaaatcattg              |
| <i>CsWSD1.1F</i>  | cagtGGTCTCacaacatgagtgggggcggcgatg                      |
| <i>CsWSD1.1R</i>  | cagtGGTCTCatacagacaatttccttggtcatcctctgctcaagaatag      |
| <i>CsWSD1.4F</i>  | cagtCGTCTCacaacatggaacctgaagaaggtagtggtcgac             |
| <i>CsDWSD1.4R</i> | cagtCGTCTCatacattccataacagtagttttgactgatatttctcaactacag |
