# Supplementary material for: Genome-Wide Identification, Classification, and Expression Analyses of the CsDGAT Gene Family in Cannabis sativa L. and Their Response to Cold Treatment
Source: MDPI journal article supplement (doi:10.3390/ijms24044078), 2023-02-17
Supplement: s1 [file s1]

**Table S6. Expression levels of *CsDGAT* genes in developing seeds of hemp at different growth stages after fertilization**

| Gene name       | Growth stages after fertilization (days) |         |         |
|-----------------|------------------------------------------|---------|---------|
|                 | 10 d                                     | 20 d    | 27 d    |
| <i>CsDGAT1</i>  | 14.0056                                  | 8.6023  | 15.4813 |
| <i>CsDGAT2</i>  | 20.0175                                  | 16.7321 | 17.6489 |
| <i>CsDGAT3</i>  | 41.836                                   | 24.8968 | 52.4468 |
| <i>CsWSD1.1</i> | 7.2513                                   | 6.5081  | 6.8826  |
| <i>CsWSD1.2</i> | 11.5908                                  | 13.7041 | 14.8692 |
| <i>CsWSD1.3</i> | 0.1409                                   | 0.8141  | 0.5194  |
| <i>CsWSD1.4</i> | 37.0738                                  | 63.1163 | 82.7452 |
| <i>CsWSD1.5</i> | 1.35                                     | 0.1651  | 0.1843  |
| <i>CsWSD1.6</i> | 2.2992                                   | 1.5679  | 5.8092  |
| <i>CsWSD1.7</i> | 9.0425                                   | 8.9866  | 8.26    |
